# Supplementary material for: Early detection and classification of live bacteria using time-lapse coherent imaging and deep learning
Source: PubMed Central journal article supplement (PMC7351775; doi:10.1038/s41377-020-00358-9), 2020-07-10
Supplement: 41377_2020_358_MOESM1_ESM.pdf [file 41377_2020_358_MOESM1_ESM.pdf]

## Supplementary Information

### Early detection and classification of live bacteria using time-lapse coherent imaging and deep learning

Hongda Wang<sup>1,2,3†</sup>, Hatice Ceylan Koydemir<sup>1,2,3†</sup>, Yunzhe Qiu<sup>1,2,3†</sup>, Bijie Bai<sup>1,2,3</sup>, Yibo Zhang<sup>1,2,3</sup>, Yiyin Jin<sup>1</sup>, Sabiha Tok<sup>1,2,3,4</sup>, Enis Cagatay Yilmaz<sup>1</sup>, Esin Gumustekin<sup>5</sup>, Yair Rivenson<sup>1,2,3</sup>, Aydogan Ozcan<sup>1,2,3,6,\*</sup>

<sup>1</sup>Electrical and Computer Engineering Department, University of California, Los Angeles, CA, 90095, USA

<sup>2</sup>Bioengineering Department, University of California, Los Angeles, CA, 90095, USA

<sup>3</sup>California NanoSystems Institute, University of California, Los Angeles, CA, 90095, USA

<sup>4</sup>Department of Biophysics, Istanbul Medical Faculty, Istanbul University, Istanbul, 22000, Turkey

<sup>5</sup>Department of Microbiology, Immunology, and Molecular Genetics, University of California, Los Angeles, CA, 90095, USA

<sup>6</sup>Department of Surgery, David Geffen School of Medicine, University of California, Los Angeles, CA, 90095, USA.

†Equal contributing authors.

\*Corresponding author: [ozcan@ucla.edu](mailto:ozcan@ucla.edu)

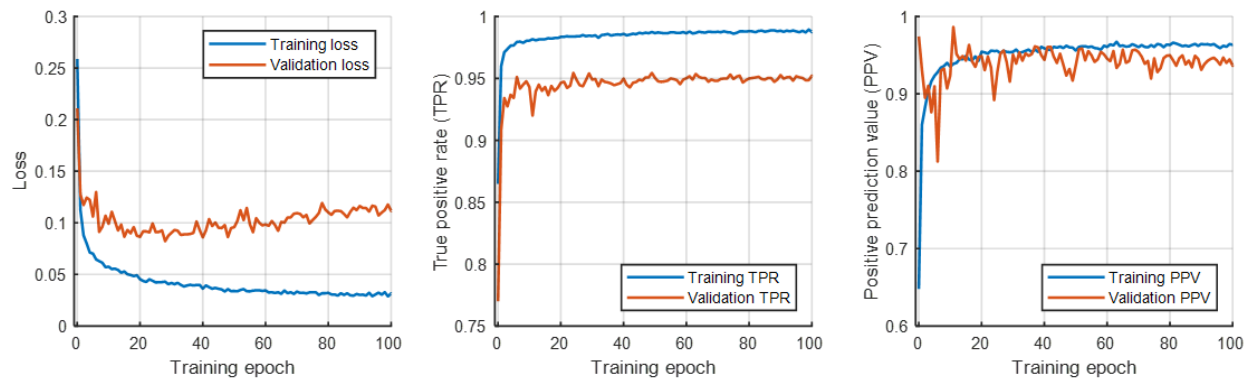

**Figure S1.** Training loss, true positive rate (TPR), and positive prediction value (PPV) curves of the neural network model for colony growth detection.

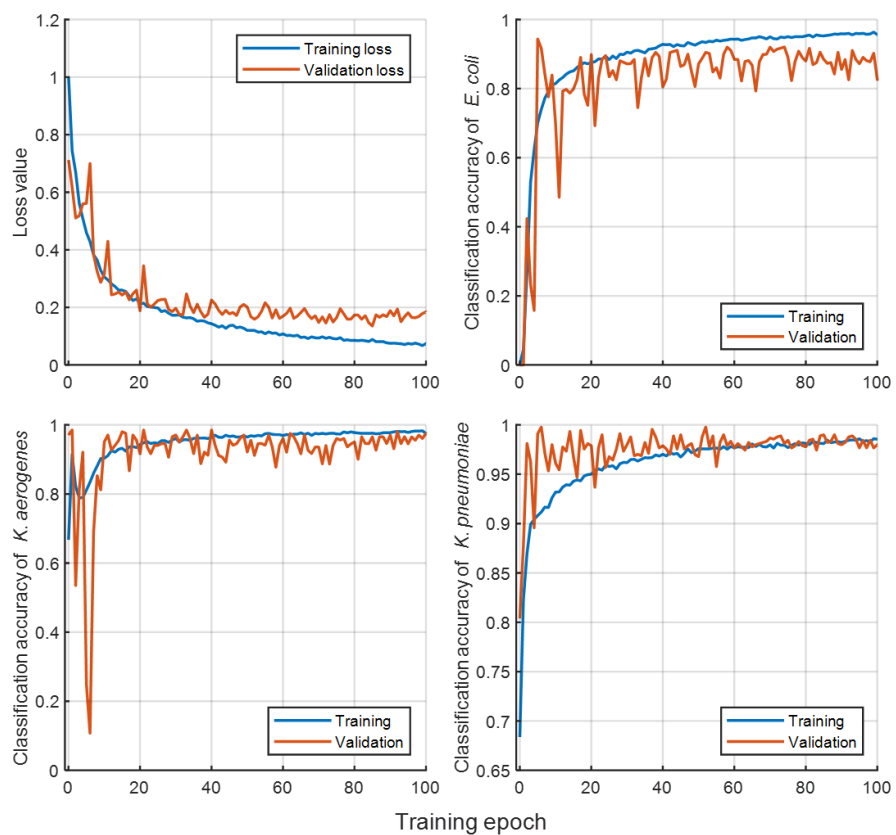

**Figure S2.** Training loss and classification accuracy curves of the neural network model for colony species classification.

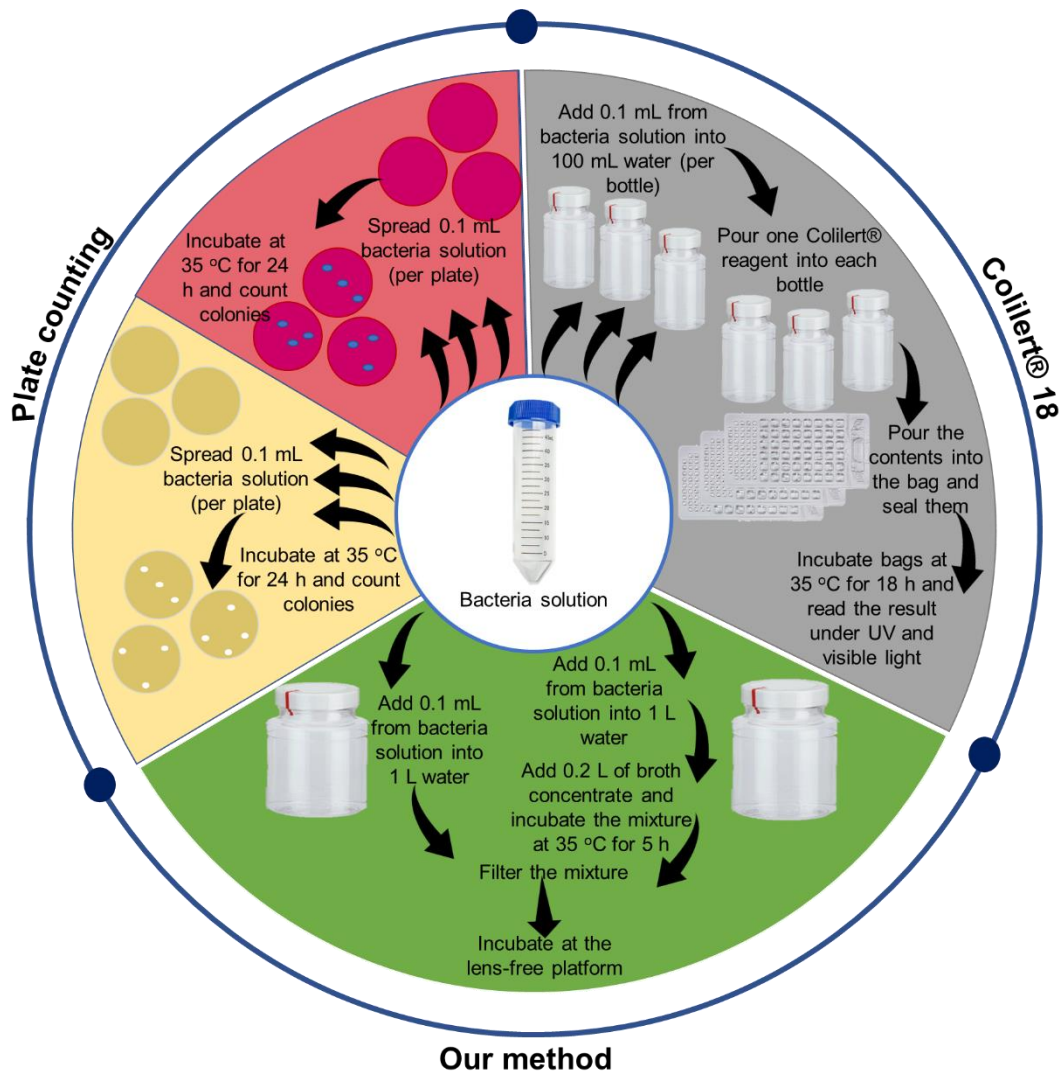

**Figure S3.** Schematics comparing the major steps involved in each one of the three different methods analyzed in this work.

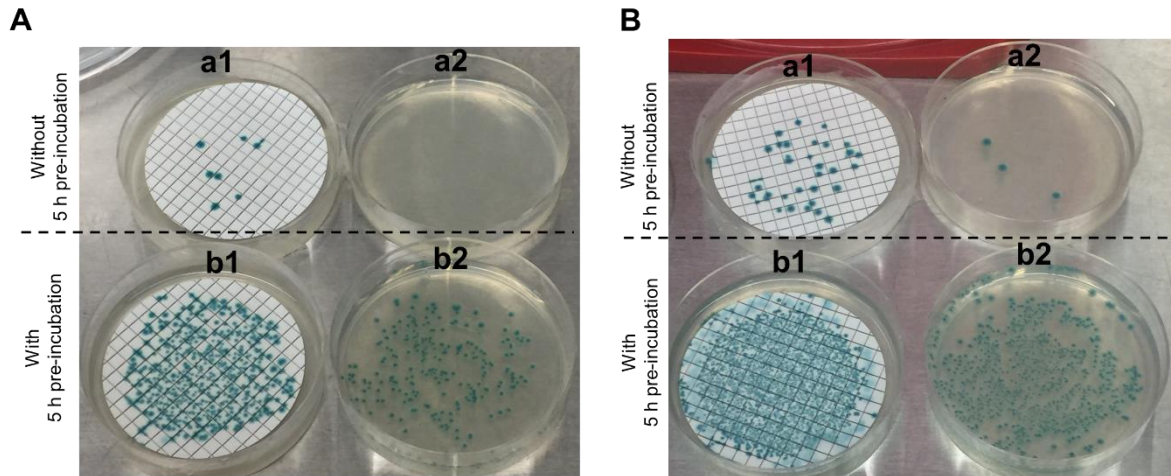

**Figure S4.** Example photos of CHROMagar™ ECC plates for two different bacterial concentrations of (A)  $37.9 \pm 5.6$  CFU L<sup>-1</sup>, (B)  $160 \pm 21.3$  CFU L<sup>-1</sup>. a1) No pre-incubation, after transferring bacteria from filter membrane to the agar plate and incubation at a benchtop incubator for 24 h. a2) No pre-incubation, transferred bacteria from the filter membrane in the photo of a1, incubated at the lens-free imaging setup for 24 h. b1) 5 h pre-incubation, after transferring bacteria from filter membrane to the agar plate and incubation at a benchtop incubator for 19 h (total incubation time: 5 + 19 = 24 h). b2) 5 h pre-incubation, transferred bacteria from the filter membrane in the photo of a1, incubated at the lens-free imaging setup for 19 h (total incubation time: 5 + 19 = 24 h).

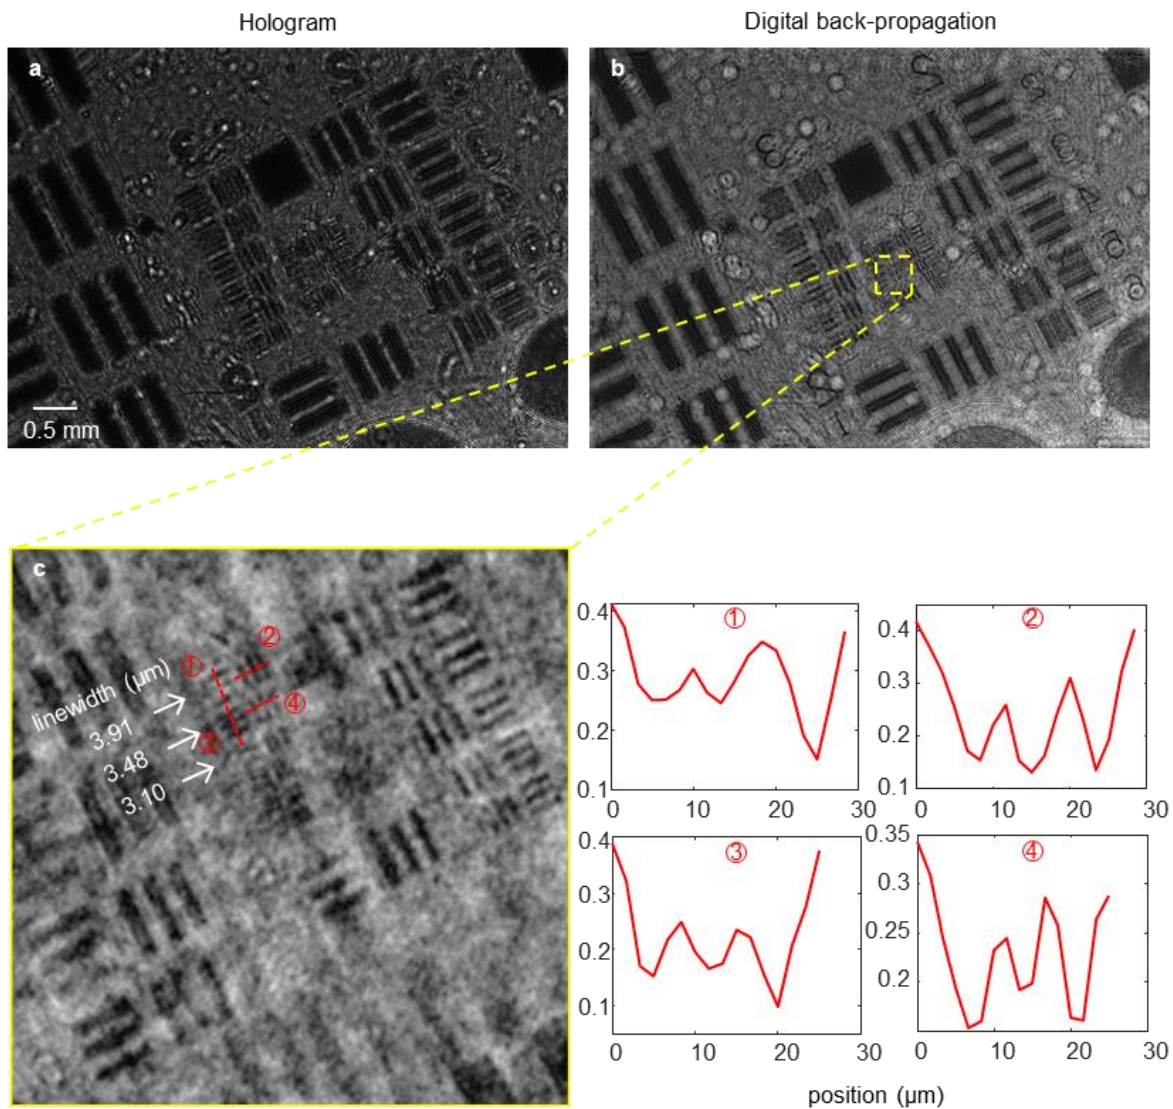

**Figure S5.** Resolution characterization of the lens-free bacterial colony detection system. (a) Raw hologram captured by the image sensor. (b) Digitally back-propagated hologram. (c) Zoomed-in region demonstrates a half-pitch resolution of  $\sim 3.5 \mu\text{m}$ .

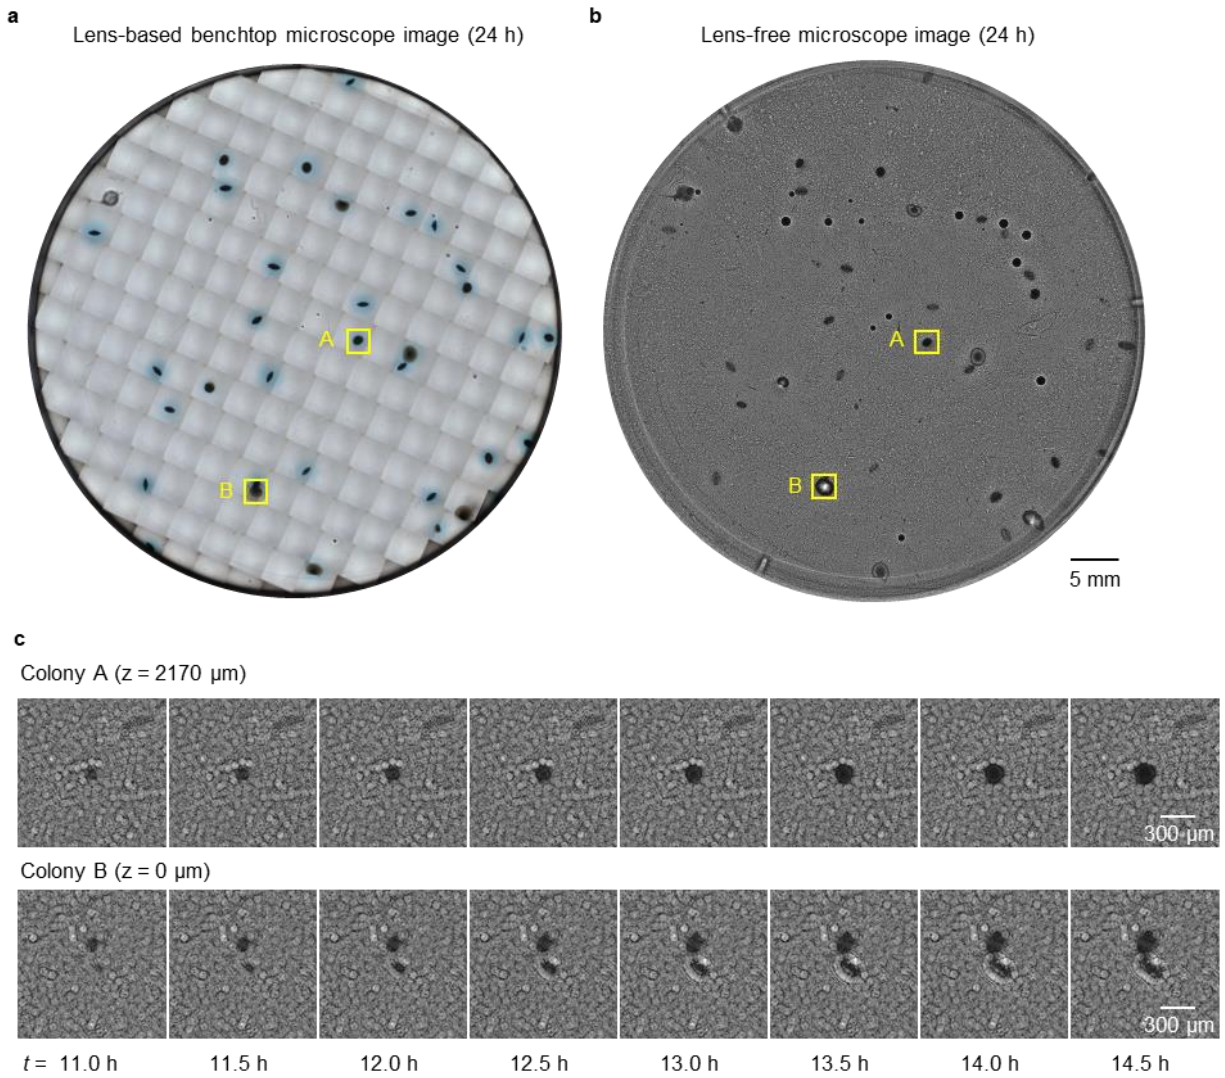

**Figure S6.** *E. coli* colonies grew at different depths within the 3D culture medium. (a) Image of the sample plate captured using a lens-based benchtop microscope after 24 hours of incubation and stitched by the microscope software. (b) Image of the sample plate captured using our lens-free microscope at 24 h of incubation. (c) Images of 2 colonies marked in (a) and (b) that grew at different depths, axially separated by  $\sim 2.17 \text{ mm}$ .

- HSA and TSA plate count:  $48 \pm 3.7$  CFU

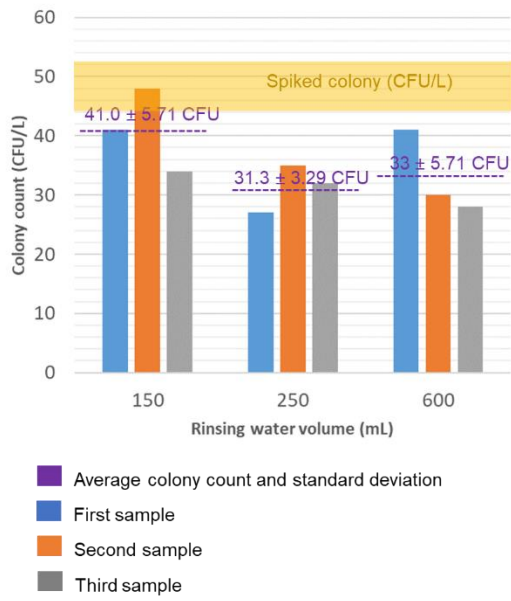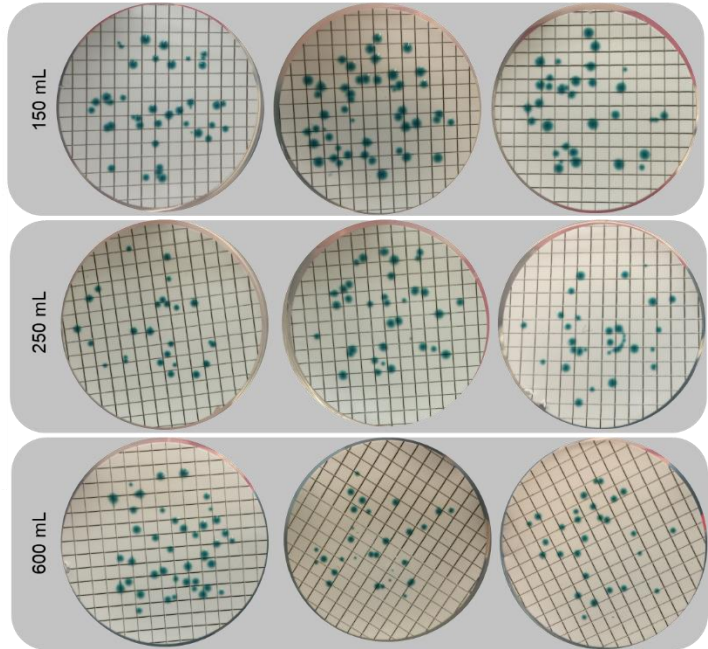

**Figure S7.** Colony counts obtained for optimization of the amount of water used for washing the sample container.



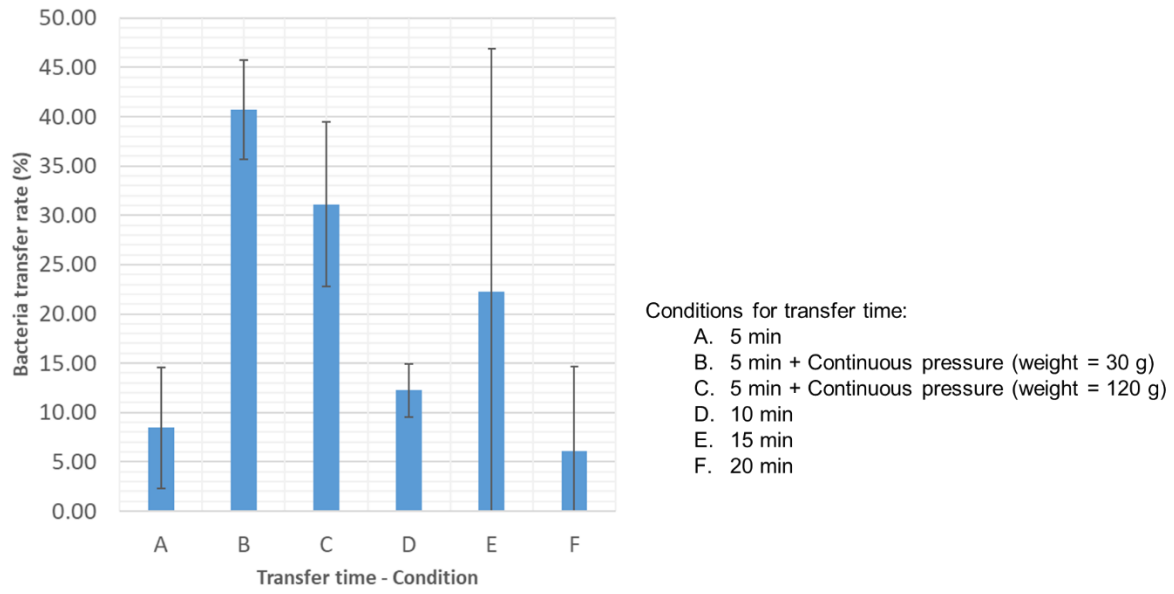

**Figure S8.** Bacteria transfer rate (%) obtained at different conditions of transfer time.

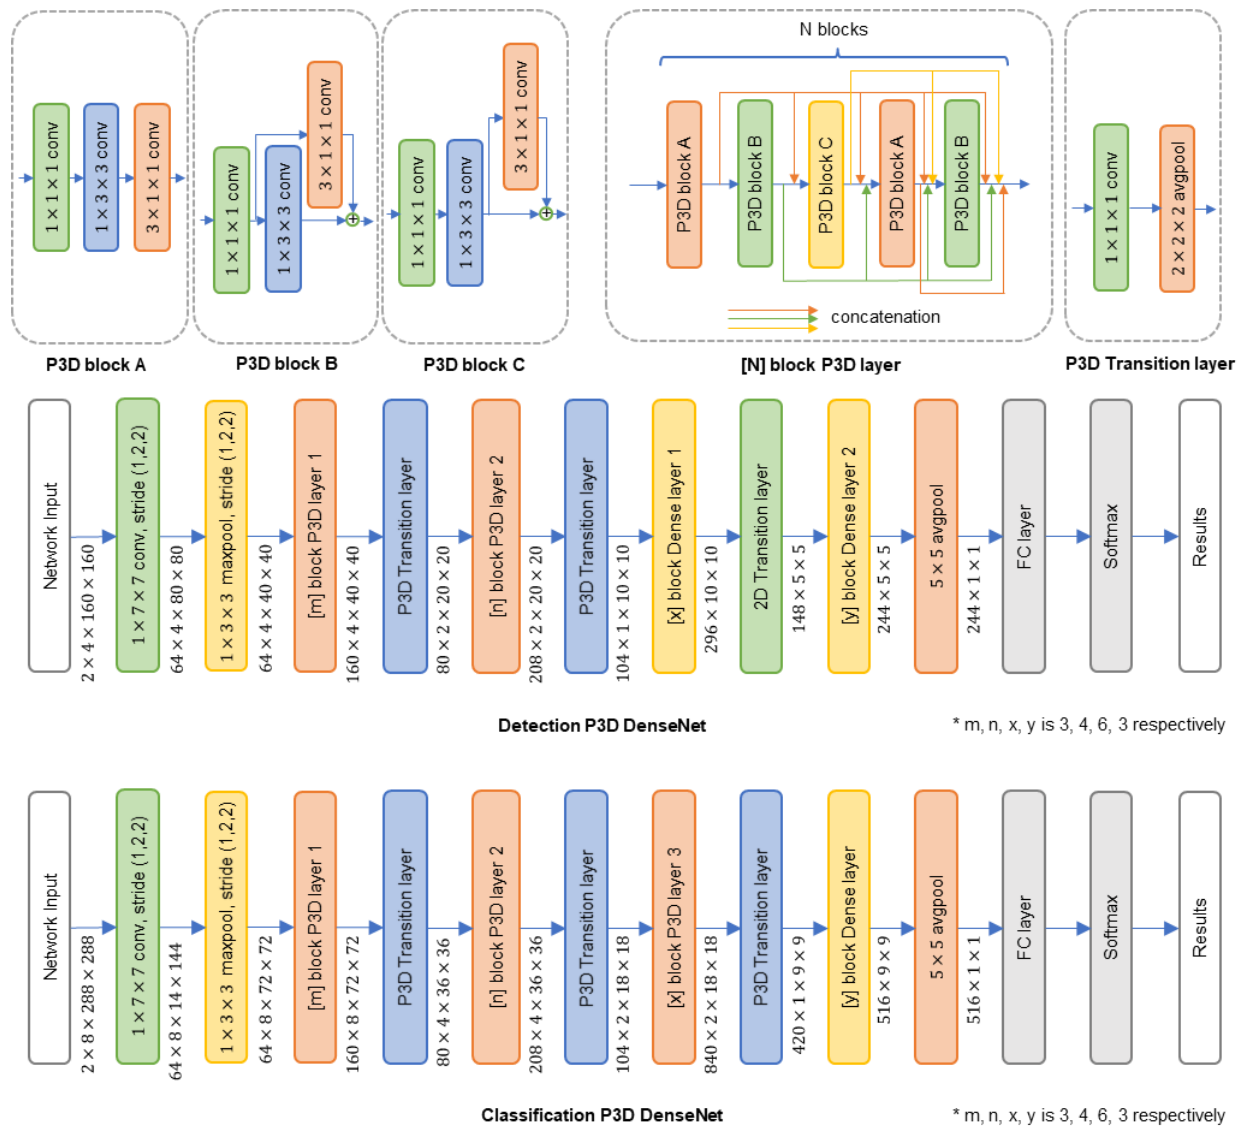

**Figure S9.** Schematic of pseudo-3D (P3D) DenseNet models for the detection and classification of growing colonies using the lens-free imaging system. The detection neural network model has  $1.21 \times 10^6$  trainable parameters. The classification neural network model has  $1.36 \times 10^6$  trainable parameters.

**Table S1.** Colony counts of some *E. coli* spiked samples in comparison to Colilert®-18 and plate counting.

| Colilert®-18 |       |       |         |                | Plate counting (TSA plates) |     |     |         |                | Plate counting (ECC ChromoSelect Selective Agar plates) |     |     |         |                |
|--------------|-------|-------|---------|----------------|-----------------------------|-----|-----|---------|----------------|---------------------------------------------------------|-----|-----|---------|----------------|
| R1*          | R2*   | R3*   | Average | Std. deviation | R1†                         | R2† | R3† | Average | Std. deviation | R1†                                                     | R2† | R3† | Average | Std. deviation |
| 172.3        | 172.3 | 135.4 | 160.00  | 21.30          | 169                         | 162 | 198 | 176.33  | 19.09          | 164                                                     | 137 | 140 | 147.00  | 14.80          |
| 11           | 17.3  | 20.1  | 16.13   | 4.66           | 15                          | 18  | 14  | 15.67   | 2.08           | 17                                                      | 13  | 17  | 15.67   | 2.31           |
| 225.4        | 166.4 | 228.2 | 206.67  | 34.90          | 228                         | 260 | 246 | 244.67  | 16.04          | 245                                                     | 241 | 221 | 235.67  | 12.86          |
| 8.6          | 8.5   | 12.1  | 9.73    | 2.05           | 4                           | 4   | 5   | 4.33    | 0.58           | 2                                                       | 5   | 11  | 6.00    | 4.58           |
| 37.9         | 43.5  | 32.3  | 37.9    | 5.6            | 52                          | 37  | 30  | 39.67   | 11.24          | 35                                                      | 28  | 36  | 33.00   | 4.36           |
| 3.1          | 1     | <1    | 2.05    | 1.48           | 3                           | 1   | 0   | 1.33    | 1.53           | 3                                                       | 3   | 2   | 2.67    | 0.58           |
| 107.6        | 113.7 | 101.7 | 107.67  | 6.00           | 76                          | 116 | 99  | 97.00   | 20.07          | 150                                                     | 134 | 123 | 135.67  | 13.58          |
| 172.3        | 210.5 | 121.1 | 167.97  | 44.86          | 165                         | 165 | 141 | 157.00  | 13.86          | 169                                                     | 171 | 164 | 168.00  | 3.61           |

R is for replicate sample

\* CFU per 100 mL

† CFU per 0.1 mL

**Table S2.** Comparison of our device against a scanning bright-field microscope for imaging of an agar plate (60 mm diameter).

| Configuration                                    | This work | Bright-field microscope (4 ×/0.1 NA objective lens) |
|--------------------------------------------------|-----------|-----------------------------------------------------|
| Field of view (FOV) per image (mm <sup>2</sup> ) | 29.4      | 14.4                                                |
| Total FOV scanned (mm <sup>2</sup> )             | ~3491     | ~2977                                               |
| Total imaging time per agar plate (min)          | ~1.5      | 128                                                 |
| Effective pixel count (million)                  | 570       | 435                                                 |
| Observation depth (µm)                           | > 20,000  | 3,000 (with 20 µm accuracy) *                       |

\* A larger focusing range and/or a higher accuracy would further increase image capture time.
